# Supplementary material for: Heritability of biting time behaviours in the major African malaria vector Anopheles arabiensis
Source: Springer Nature journal article supplement (doi:10.1186/s12936-023-04671-7), 2023-08-16
Supplement: MOESM4 [file 25928716]

# Simulate.F1.mate.correlation.2020-11-22.R

pauljohnson

2020-11-23

## R script to support the calculation of heritability of mosquito biting time.

### *Background*

The aim of this script is to simulate data similar in size and structure to the mosquito biting time data, to show how assortative mating influences the phenotypic correlation among F1 mates, and the consequent expected bias in estimation of heritability.

### *Start script*

Save figures to directory:

```
knitr::opts_chunk$set(fig.path = "Simulate.F1.mate.correlation.2020-11-22_figures/")
```

Load packages:

```
library(splines)
library(scales)
```

Clear memory:

```
rm(list = ls())
```

### *Simulation options*

Simulate assortative mating among F1 females and males? (change this to illustrate lack of bias when mating is not assortative).

```
assort <- TRUE
```

Number of offspring (similar to mosquito experiment):

```
n <- 60
```

Choose heritability values Simulate h2 values across its range from 0 to 1.

```
n.sim <- 10000
h2.list <- seq(0, 1 - 1/n.sim, length.out = n.sim) + 0.5/n.sim
```

Set random seed for repeatability <https://www.random.org/integers/?num=1&min=0&max=1000000000&col=1&base=10&format=html&rnd=new>

```
set.seed(567952879) # Timestamp: 2020-11-23 11:13:18 UTC
```

*Loop over h2 values estimating phenotypic correlation among F1 mates*

```
rP <-
  sapply(h2.list, function(h2) {
    # variance parameters
    Vp <- 1 # phenotypic variance
    Va <- Vp * h2 # genetic variance
    Ve <- Vp - Va # environmental/error variance
```

```

# start data frame to store values of relatives
dat <- data.frame(id = 1:n)

# simulate trait values (biting time) of grandparents (FO), and scale to standard normal
dat$GMm <- as.vector(scale(sample(rep(1:3, length.out = n)))) # mothers of mothers
dat$GMf <- as.vector(scale(sample(rep(1:3, length.out = n)))) # mothers of fathers
dat$GFm <- as.vector(scale(sample(rep(1:3, length.out = n)))) # fathers of mothers
dat$GFf <- as.vector(scale(sample(rep(1:3, length.out = n)))) # fathers of fathers

# make grandmothers perfectly correlated, as in the mosquito experiment
# (this doesn't affect the h2 estimate)
if(assort) dat$GMf <- dat$GMm

# simulate F1 values as the mean of their parents * h2 + environmental noise
dat$F1m <- h2*(dat$GMm + dat$GFm)/2 + rnorm(n, sd = sqrt(Ve))
dat$F1f <- h2*(dat$GMf + dat$GFf)/2 + rnorm(n, sd = sqrt(Ve))
var(dat$F1m)
var(dat$F1f)

# these lines can be run if stepping into the loop to show that
# the simulated h2 values are accurately estimated:
if(FALSE) {
  # estimate h2 by regression of F1 males on FO
  fit <- lm(F1m ~ I((GMm + GFm)/2), data = dat)
  c(h2 = h2, h2.est = as.vector(coef(fit)[2]))

  # estimate h2 by regression of F1 females on FO
  fit <- lm(F1f ~ I((GMf + GFf)/2), data = dat)
  c(h2 = h2, h2.est = as.vector(coef(fit)[2]))

  # ...these estimates can be shown to be accurate by choosing very large n, e.g. 10000
}

# permute F1 fathers to avoid correlations between F1 parents within FO biting time
# groups (i.e. stratified by FO grandmother's phenotype). thus the only correlation is
# due to stratification.
dat$F1f.mix.i[dat$GMf < -1] <- sample(dat$id[dat$GMf < -1])
dat$F1f.mix.i[dat$GMf > 1] <- sample(dat$id[dat$GMf > 1])
dat$F1f.mix.i[is.na(dat$F1f.mix.i)] <- sample(dat$id[is.na(dat$F1f.mix.i)])

# if no assortative mating then uncorrelate F1f from F1m
if(!assort) dat$F1f.mix.i <- sample(dat$F1f.mix.i)

# re-order F1f and GMf so that they are correctly aligned with offspring
dat$F1f.mix <- dat$F1f[dat$F1f.mix.i]
dat$GMf.mix <- dat$GMf[dat$F1f.mix.i]

# correlation between F1 mates (rP)
cor(dat$F1f.mix, dat$F1m)
})

```

*Plot results*

Function to plot a smooth spline (and optionally print a predicted value)

```
lines.spline <-
  function(x, y, dof = 4, pred.x = NULL) {
    require(splines)
    fit <- lm(y ~ ns(x, df = dof))
    x.pred <- seq(min(x), max(x), length.out = 100)
    lines(x.pred, predict(fit, data.frame(x = x.pred)), lty = 2, lwd = 1.5)
    if(!is.null(pred.x)) {
      return(data.frame(x = pred.x, y = predict(fit, data.frame(x=pred.x))))
    }
  }
}
```

Set up plotting parameters

```
col <- alpha("blue", 0.1)
pch <- 16
```

Plot  $r_P$  against  $h^2$

Add spline

```
plot(h2.list, rP, xlab = expression(h^2), ylab = expression(r[P]), col = col, pch = pch)
lines.spline(x = h2.list, y = rP)
abline(h = 0)
title(expression("Fig. 1. Phenotypic correlation among F1 mates, r"[P]*", by heritability, h"^2))
```

Fig. 1. Phenotypic correlation among F1 mates,  $r_P$ , by heritability,  $h^2$

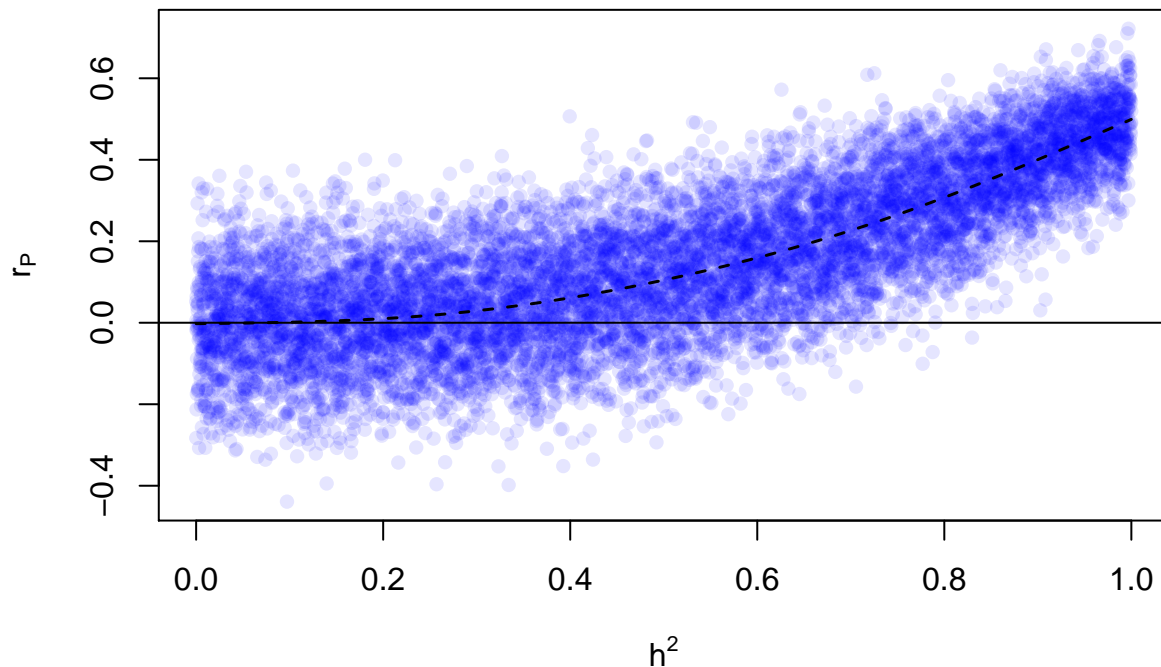

Plot  $h^2$  with expected bias against true  $h^2$

Add spline

```
h2.with.bias <- h2.list * (1 + rP) * (1 + rP * h2.list)
plot(h2.list, h2.with.bias, xlab = expression(h^2),
     ylab = "",
     col = col, pch = pch)
```

```

mtext(expression("Biased h^2*": "*h^2 * (1 + r[P]) * (1 + r[P] * h^2)"), side = 2, line = 2.5)
lines.spline(h2.list, h2.with.bias)
abline(0, 1, lty = 3)
title(expression("Fig. 2. Heritability, h^2*", with expected bias due to r"[P]>0*", by true h^2))
legend("topleft", legend = c("Biased", "Unbiased"), lty = 2:3)

```

Fig. 2. Heritability,  $h^2$ , with expected bias due to  $r_P > 0$ , by true  $h^2$

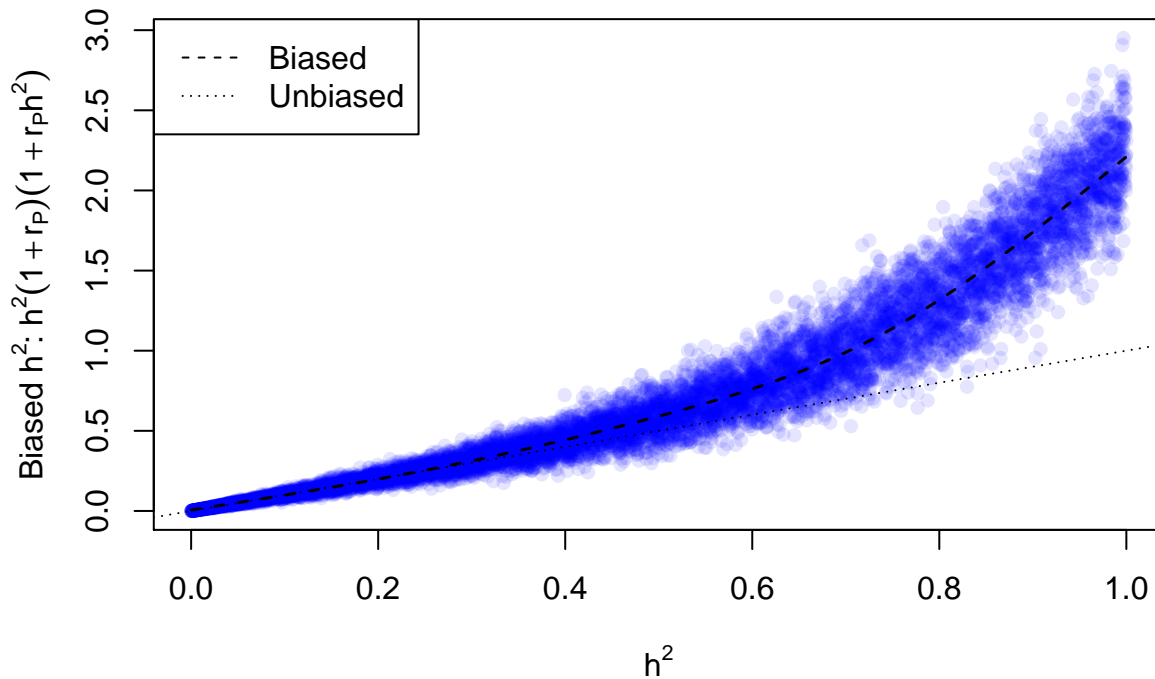

Plot percentage bias in  $h^2$  (given  $r_P$ ) against  $h^2$   
 Add spline and output expected bias in  $h^2$  at  $h^2=0.5$

```

h2.percent.bias <- 100 * (h2.with.bias/h2.list - 1)
plot(h2.list, h2.percent.bias, xlab = expression(h^2),
     ylab = expression("% bias in h^2"),
     col = col, pch = pch)
title(expression("Fig. 3. Bias in h^2*" due to r"[P]>0*", by true h^2))
abline(h = 0)
h2.percent.bias.at.h2 <-
  lines.spline(h2.list, h2.percent.bias, pred.x = seq(0, 1, by = 0.1))

```

Fig. 3. Bias in  $h^2$  due to  $r_p > 0$ , by true  $h^2$

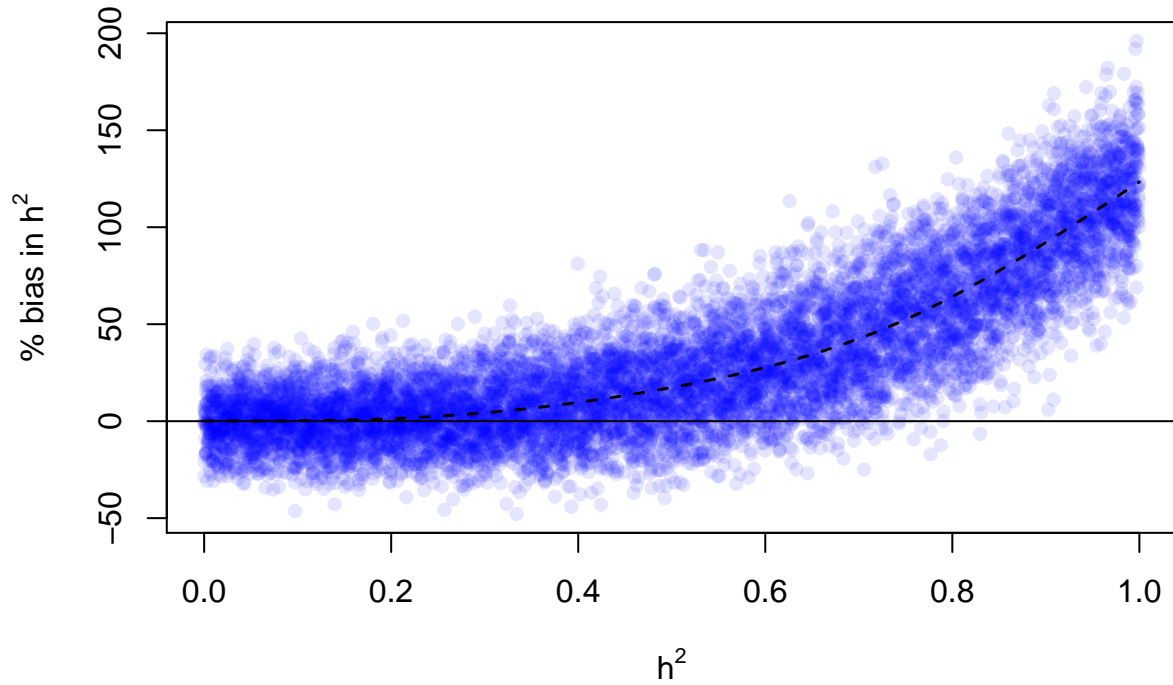

```
names(h2.percent.bias.at.h2) <- c("h2", "percent.bias.in.h2.estimate")
h2.percent.bias.at.h2$percent.bias.in.h2.estimate <-
  round(h2.percent.bias.at.h2$percent.bias.in.h2.estimate)
```

Expected percentage bias in  $h^2$  when  $h^2 = 0.3-0.5$ :

```
h2.percent.bias.at.h2
```

```
##      h2 percent.bias.in.h2.estimate
## 1 0.0              0
## 2 0.1              0
## 3 0.2              1
## 4 0.3              4
## 5 0.4             10
## 6 0.5             17
## 7 0.6             28
## 8 0.7             43
## 9 0.8             64
## 10 0.9            92
## 11 1.0           123
```
